# Supplementary material
Source: PubMed Central journal article supplement (PMC2077854)
Supplement: NIHMS32807-supplement-Supp_Material.pdf [file NIHMS32807-supplement-Supp_Material.pdf]

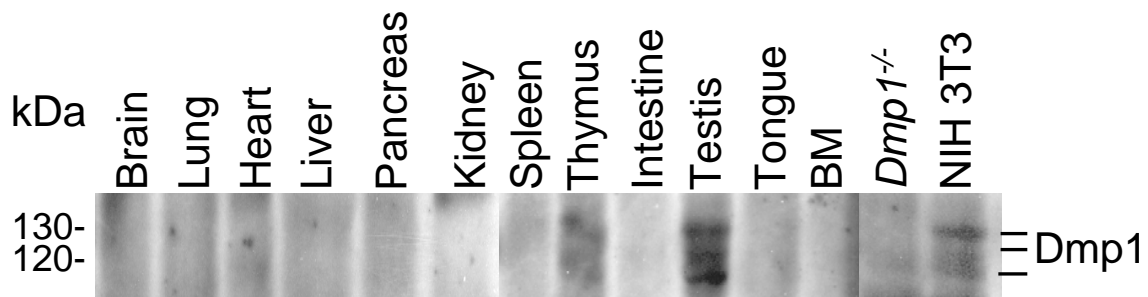

### Supplementary Material 1, Mallakin et al

Western blotting analysis of 8-week-old male with the RAF antibody. Multiple bands of Dmp1 (120-130kDa) are detected in the lanes of testis, thymus, and NIH 3T3 cells.
